# Supplementary material for: Glycosylation Analysis of Urinary Peptidome Highlights IGF2 Glycopeptides in Association with CKD
Source: MDPI journal article supplement (doi:10.3390/ijms24065402), 2023-03-11
Supplement: s1 [file s1]

### Supplementary Information Index

Table S1 – Proteome Discoverer 1.4 output of protein identifications for all 10 CE-MS/MS raw files

Table S2 – Proteome Discoverer 1.4 output of peptide identifications for all 10 CE-MS/MS raw files

Table S3 - Urinary nine IGF2 peptides

Table S4 - Results of correlation analyses

Table S5 – Results of ELISA assay

Table S6 – Outputs from “prediction tool” Proteasix
